# Supplementary material
Source: PubMed Central journal article supplement (PMC6792072)
Supplement: djz001_supplementary_data.pdf [file djz001_supplementary_data.pdf]

## SUPPLEMENTARY MATERIALS

**Supplementary Table 1. Prevalence of adverse events by symptom and globally for Blacks and Whites\***

| <b>Adverse Events</b>                                                 | <b>Blacks<br/>No. (%)<br/>n=220</b> | <b>Whites<br/>No. (%)<br/>n=214</b> | <b>p<sup>†</sup></b> |
|-----------------------------------------------------------------------|-------------------------------------|-------------------------------------|----------------------|
| By Symptom <sup>‡</sup> , Weeks 1-16                                  |                                     |                                     |                      |
| Hostility, aggression, or other change in behavior not normal for you | 13 (5.9)                            | 13 (6.1)                            | .94                  |
| Fatigue or loss of energy                                             | 18 (8.2)                            | 21 (9.8)                            | .55                  |
| Nausea                                                                | 34 (15.5)                           | 43 (20.1)                           | .21                  |
| Trouble sleeping                                                      | 26 (11.8)                           | 28 (13.1)                           | .69                  |
| Headaches                                                             | 20 (9.1)                            | 17 (7.9)                            | .67                  |
| Abnormal dreams                                                       | 29 (13.2)                           | 9 (4.2)                             | <.001                |
| Gas or flatulence                                                     | 37 (16.8)                           | 32 (14.9)                           | .60                  |
| Constipation                                                          | 26 (11.8)                           | 18 (8.4)                            | .24                  |
| Dizziness                                                             | 8 (3.6)                             | 3 (1.4)                             | .22                  |
| Dry mouth                                                             | 18 (8.2)                            | 17 (7.9)                            | .93                  |
| Irritability                                                          | 24 (10.9)                           | 27 (12.6)                           | .58                  |
| Global, Weeks 1-16                                                    |                                     |                                     |                      |
| Any <sup>§</sup>                                                      | 210 (95.5)                          | 206 (96.3)                          | .67                  |
| Serious Adverse Events <sup>¶</sup>                                   | 1 (0.5)                             | 6 (2.3)                             | .12                  |

\*Varenicline treatment began at Week 0 and continued through Week 12. 4 Blacks and 11 Whites did not return from weeks 1-16 and were excluded from these analyses. All associated

<sup>†</sup>P values were calculated using a two-sided Chi-squared test except for dizziness and Serious Adverse Events, which were calculated using a two-sided Fischer's exact test because of the minimal number of events.

<sup>‡</sup>No. and % of participants that reported experiencing each symptom between Weeks 1-16 at a grade 3 (bothers them 'a lot') or 4 (bothers them 'terribly') and that they attributed to varenicline, not another cause.

<sup>§</sup>No. and % of participants that reported any of the above symptom between Weeks 1-16 at a grade 3 (bothers them 'a lot') or 4 (bothers them 'terribly') and that they attributed to varenicline, not another cause.

<sup>¶</sup>Serious Adverse Events were: Blacks, fluid on the heart (1); Whites, death (1), depressive episode (1), seizure (1), heart attack (1), suicide attempt (1), intestinal blockage (1). All Serious Adverse Events led to hospitalization and/or discontinuation of treatment.

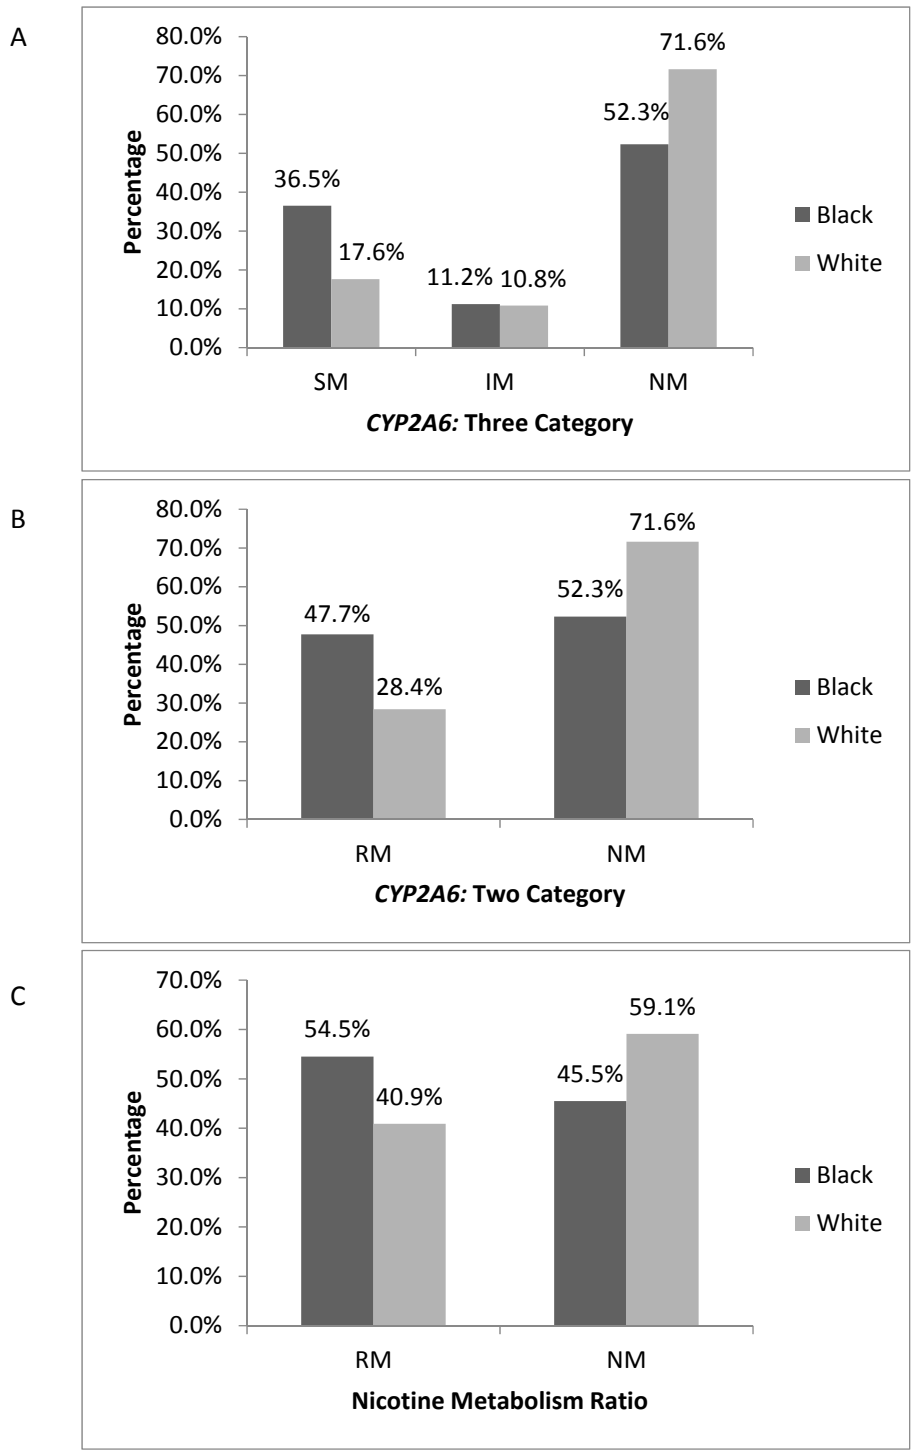

**Supplementary Figure 1. Nicotine metabolism by race.** Percentage of Blacks and Whites categorized as A. Slow (SM), intermediate (IM), and normal (NM) metabolizers by *CYP2A6*. B. Reduced (RM = IM + SM) and NM metabolizers by *CYP2A6*. C. RM and NM using 3HC/COT cut point of .31 based on prior studies.
